# Supplementary material for: Supported Pd–Au bimetallic nanoparticles as an efficient catalyst for the hydrodeoxygenation of vanillin with formic acid at room temperature
Source: Royal Society of Chemistry journal article supplement (doi:10.1039/d1gc04240h), 2022-01-01
Supplement: d1gc04240h1.pdf [file d1gc04240h1.pdf]

---

*Supporting Information*

**Supported Pd-Au bimetallic nanoparticles as efficient catalyst for hydrodeoxygenation of vanillin with formic acid at room temperature**

Pengyu Wu,<sup>a</sup> Danxia Zhao,<sup>b</sup> Guoping Lu<sup>a</sup> and Chun Cai<sup>\*a</sup>

<sup>a</sup> School of Chemistry and Chemical Engineering, Nanjing University of Science & Technology, Xiaolingwei 200, Nanjing 210094, P. R. China.

<sup>b</sup> Department of Environmental Engineering, Taizhou University, Taizhou, Zhejiang 318000, China.

\* Corresponding author e-mail: c.cai@njust.edu.cn

**Table of contents:**

|                                                             |          |
|-------------------------------------------------------------|----------|
| <b>1. General Information</b>                               | <b>2</b> |
| <b>2. Catalysts Preparation</b>                             | <b>2</b> |
| <b>3. Catalytic HDO of vanillin</b>                         | <b>3</b> |
| <b>4. Catalytic performance in recent studies</b>           | <b>3</b> |
| <b>5. ICP-MS results of the catalysts</b>                   | <b>4</b> |
| <b>6. XPS spectra of catalysts</b>                          | <b>5</b> |
| <b>7. Time-course monitoring of <math>c_{FA}</math></b>     | <b>6</b> |
| <b>8. Results of the experiments with vanillin alcohol</b>  | <b>6</b> |
| <b>9. TEM image of recovered PdAu/g-<math>C_3N_4</math></b> | <b>7</b> |
| <b>References</b>                                           | <b>7</b> |

## 1. General Information

All chemical reagents are obtained from commercial suppliers and used without further purification. Inductively coupled plasma mass spectrometry (ICP-MS) was analyzed on Optima 7300 DV. The scanning electron microscopy (SEM) images were obtained using a Hitachi S-4800 apparatus on a sample powder previously dried and sputter-coated with a thin layer of gold. The transmission electron microscopy (TEM) images were taken using a Philips Tecnai 12 microscope operating at 120 kV. TEM samples were prepared by dispersed in methanol and placed on a carbon film covered copper grid. High resolution transmission electron microscopy (HRTEM) was performed on a FEI Tecnai G2 F20 S-TWIN. X-ray photoelectron spectroscopy (XPS) was performed on an ESCALAB 250Xi spectrometer, using an Al K $\alpha$  X-ray source (1486.6 eV of photons) and calibrated by setting the C 1s peak to 284.80 eV. The crystal structures of the synthesized catalysts were recorded by a D8 ADVANCED X-ray diffractometer (XRD), employing a range from 5 ° to 80 °. The H<sub>2</sub>-TPD data were obtained on a Micromeritics AutoChem II S3 2920 instrument. Products were analyzed by gas chromatography (GC) on an Agilent 7890A gas chromatograph with flame ionization detection, equipped with HP-5 capillary columns, and gas chromatography-mass spectroscopy (GC-MS) with a Thermo Scientific Trace 1300 GC/MS instrument equipped with TR-5MS columns.

## 2. Catalysts Preparation

The g-C<sub>3</sub>N<sub>4</sub> support was synthesized according to a former report.<sup>1</sup> The pyrolysis of melamine was carried out in a tubular furnace under air. The sample was heated from room temperature to 500 °C at a heating rate of 5 °C min<sup>-1</sup> and kept at this temperature for 2 h. After cooling to room temperature, g-C<sub>3</sub>N<sub>4</sub> was obtained.

MIL-101(Fe) was synthesized in the following steps. Typically, 1350.0 mg (5.0 mmol) of FeCl<sub>3</sub>·6H<sub>2</sub>O were dissolved in 15.0 mL of DMF, and then the solution was mixed with a solution of 500.0 mg (3 mmol) of terephthalic acid in 15.0 mL of DMF. The mixed solution was stirred thoroughly for 30 min and transferred to a Teflon-lined autoclave and treated in an oven for 24 h at 110 °C. The resulting solid was then separated by centrifugation, washed with DMF and subsequently with methanol to remove un-reacted ligands. The product was dried under vacuum at 50 °C for 12 h.

Catalysts were prepared by impregnation-reduction method, and in the typical preparing

procedure of PdAu/g-C<sub>3</sub>N<sub>4</sub>, 500 mg of g-C<sub>3</sub>N<sub>4</sub> was dispersed in 50 mL of deionized water, then 3 mL of Na<sub>2</sub>PdCl<sub>4</sub> solution (5 mg Pd per mL), 64 mg AuCl<sub>3</sub> solution (15 mg Au) and 150 mg L-lysine were added. The mixture was then vigorously stirred for 30 min under argon atmosphere. After that, NaBH<sub>4</sub> solution (60 mg dissolved in 10 mL deionized water) was added drop by drop in an ice bath, the mixture was further stirred for 1 h. And then 15 mL acetone was added into the mixture, the catalyst was further aged for 24 h without stirring. Finally, the catalyst was collected by centrifugation, washed with deionized water three times and dried under vacuum at 50 °C for 12 h. Other catalysts used in this work were prepared in the same way except that metal precursors and catalyst support are different.

### 3. Catalytic HDO of vanillin

In a typical reaction procedure, 0.5 mmol of vanillin and corresponding catalyst were placed in a sealed tube, then 2 mL of deionized water and 200 µL 88 wt% FA aqueous solution were added. After the vanillin was dissolved, 6 mL of EA was added, and the mixture was stirred at room temperature for 1 h. After reaction, the mixture was extracted with EA, and the catalyst could be separated by filter, dried under vacuum and reused. The products were analyzed by GC and GC-MS, and then isolated by column chromatography in isolated yields. In this work, all the experiments were carried out in triplicate.

### 4. Catalytic performance in recent studies

**Table S1** Catalytic performance in recent studies on the HDO of vanillin with formic acid as the hydrogen source

| Catalyst                              | Temperature (°C) | Time (h) | Atmosphere                | Yield (%) | Ref.      |
|---------------------------------------|------------------|----------|---------------------------|-----------|-----------|
| Pd/TiO <sub>2</sub> @NC               | 150              | 4        | 0.5 MPa of N <sub>2</sub> | 99        | 2         |
| Ag-Pd@g-C <sub>3</sub> N <sub>4</sub> | 40 W bulb        | 4        | -                         | 99        | 3         |
| Pd/NMC                                | 150              | 3        | 0.5 MPa of N <sub>2</sub> | 99        | 4         |
| Au-Pt/CeO <sub>2</sub>                | 150              | 4.5      | 1.5 MPa of N <sub>2</sub> | 99        | 5         |
| Co@NC-700                             | 180              | 4        | 0.5 MPa of N <sub>2</sub> | 96        | 6         |
| Co@NG-6                               | 160              | 6        | -                         | 99        | 7         |
| Pd@HPC-DCD                            | 140              | 12       | 0.5 MPa of N <sub>2</sub> | 100       | 8         |
| PdAu/g-C <sub>3</sub> N <sub>4</sub>  | Room temperature | 1        | Atmosphere air            | 99        | This work |

## 5. ICP-MS results of the catalysts

**Table S2.** ICP-MS analysis of prepared catalysts

| Catalyst                                          | Element | Metal Content (mg/kg) |
|---------------------------------------------------|---------|-----------------------|
| PdAu/g-C <sub>3</sub> N <sub>4</sub>              | Pd      | 15818                 |
|                                                   | Au      | 14426                 |
| Pd/g-C <sub>3</sub> N <sub>4</sub>                | Pd      | 15167                 |
| Au/g-C <sub>3</sub> N <sub>4</sub>                | Au      | 15321                 |
| PdNi/g-C <sub>3</sub> N <sub>4</sub>              | Pd      | 14213                 |
|                                                   | Ni      | 15502                 |
| PdCu/g-C <sub>3</sub> N <sub>4</sub>              | Pd      | 16718                 |
|                                                   | Cu      | 13507                 |
| RuAu/g-C <sub>3</sub> N <sub>4</sub>              | Ru      | 14024                 |
|                                                   | Au      | 13827                 |
| PdAu/Al <sub>2</sub> O <sub>3</sub>               | Pd      | 13287                 |
|                                                   | Au      | 13131                 |
| PdAu/SiO <sub>2</sub>                             | Pd      | 16385                 |
|                                                   | Au      | 14805                 |
| PdAu/AC                                           | Pd      | 14715                 |
|                                                   | Au      | 13601                 |
| PdAu/MIL-101(Fe)                                  | Pd      | 19239                 |
|                                                   | Au      | 15188                 |
| PdAu/g-C <sub>3</sub> N <sub>4</sub> <sup>a</sup> | Pd      | 14949                 |
|                                                   | Au      | 13744                 |

<sup>a</sup> Catalyst after 5 runs.

## 6. XPS spectra of catalysts

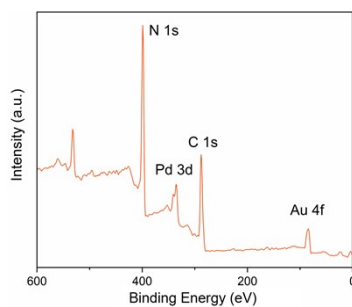

**Fig. S1** XPS survey spectra of PdAu/g-C<sub>3</sub>N<sub>4</sub>.

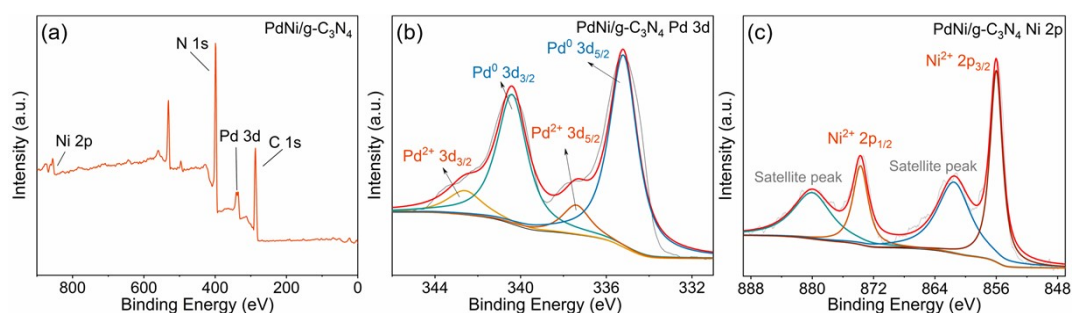

**Fig. S2** XPS spectra of PdNi/g-C<sub>3</sub>N<sub>4</sub> (a) survey, (b) Pd 3d region, (c) Ni 2p region.

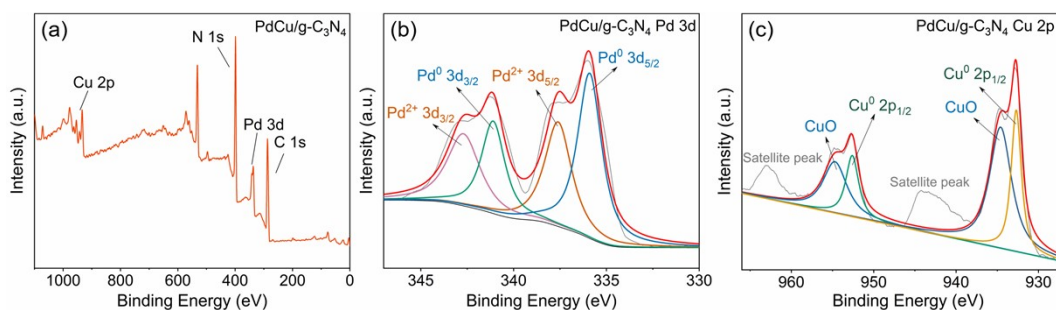

**Fig. S3** XPS spectra of PdCu/g-C<sub>3</sub>N<sub>4</sub> (a) survey, (b) Pd 3d region, (c) Cu 2p region.

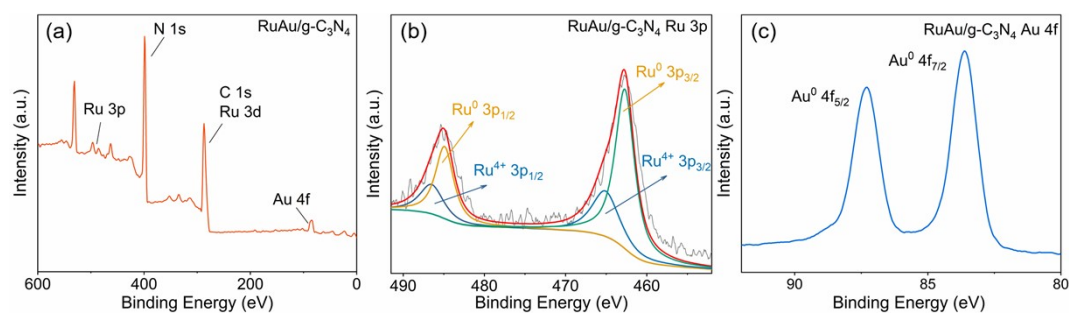

**Fig. S4** XPS spectra of RuAu/g-C<sub>3</sub>N<sub>4</sub> (a) survey, (b) Ru 3p region, (c) Au 4f region.

## 7. Time-course monitoring of $c_{\text{FA}}$

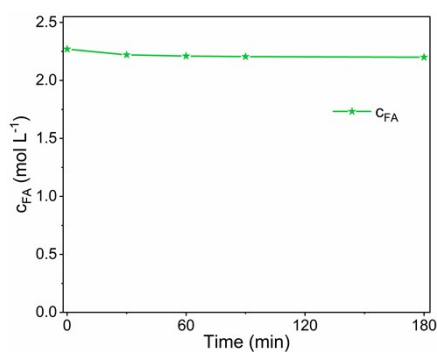

**Fig. S5** Time-course monitoring of  $c_{\text{FA}}$  in reaction system without PdAu/g- $\text{C}_3\text{N}_4$ .

## 8. Results of the experiments with vanillin alcohol

**Table S3.** Hydrogenolysis of vanillin alcohol with FA<sup>a</sup>

| <div style="display: flex; align-items: center; justify-content: center;"> <div style="text-align: center;"> <chem>COc1cc(CO)ccc(O)c1</chem><br/> <b>VA</b> </div> <div style="margin: 0 20px;"> <math>\xrightarrow[\text{RT., air}]{\text{Cat., HCOOH}}</math> </div> <div style="text-align: center;"> <chem>COc1cc(C)ccc(O)c1</chem><br/> <b>MMP</b> </div> </div> |                                |                    |
|-----------------------------------------------------------------------------------------------------------------------------------------------------------------------------------------------------------------------------------------------------------------------------------------------------------------------------------------------------------------------|--------------------------------|--------------------|
| Entry                                                                                                                                                                                                                                                                                                                                                                 | Catalyst                       | Yield <sup>b</sup> |
| 1                                                                                                                                                                                                                                                                                                                                                                     | None                           | No reaction        |
| 2                                                                                                                                                                                                                                                                                                                                                                     | g- $\text{C}_3\text{N}_4$      | No reaction        |
| 3                                                                                                                                                                                                                                                                                                                                                                     | PdAu/g- $\text{C}_3\text{N}_4$ | 99                 |
| 4                                                                                                                                                                                                                                                                                                                                                                     | Pd/g- $\text{C}_3\text{N}_4$   | 99                 |
| 5                                                                                                                                                                                                                                                                                                                                                                     | Au/g- $\text{C}_3\text{N}_4$   | 21                 |

<sup>a</sup> Reaction conditions: vanillin alcohol (0.5 mmol), 2 mL  $\text{H}_2\text{O}$  and 6 mL EA, 25 mg catalyst, 200  $\mu\text{L}$  88 wt% FA aqueous solution, room temperature, air atmosphere, 1 h. <sup>b</sup> Yields of MMP were determined by GC with hexadecane as an internal standard.

## 9. TEM image of recovered PdAu/g-C<sub>3</sub>N<sub>4</sub>

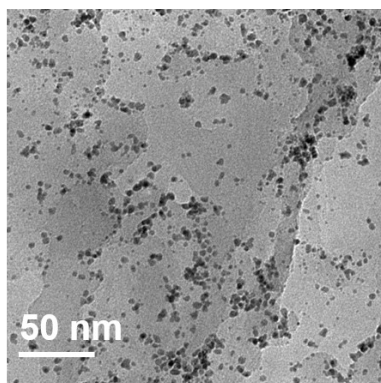

**Fig. S6** TEM image of PdAu/g-C<sub>3</sub>N<sub>4</sub> after 5 runs.

## References

1. S. C. Yan, Z. S. Li and Z. G. Zou, *Langmuir*, 2009, **25**, 10397-10401.
2. L. Wang, B. Zhang, X. Meng, D. S. Su and F.-S. Xiao, *ChemSusChem*, 2014, **7**, 1537-1541.
3. S. Verma, R. B. Nasir Baig, M. N. Nadagouda and R. S. Varma, *Green Chem.*, 2016, **18**, 1327-1331.
4. R. Nie, X. Peng, H. Zhang, X. Yu, X. Lu, D. Zhou and Q. Xia, *Catal. Sci. Technol.*, 2017, **7**, 627-634.
5. L. Wang, J. Zhang, G. Wang, W. Zhang, C. Wang, C. Bian and F.-S. Xiao, *Chem. Commun.*, 2017, **53**, 2681-2684.
6. H. Yang, R. Nie, W. Xia, X. Yu, D. Jin, X. Lu, D. Zhou and Q. Xia, *Green Chem.*, 2017, **19**, 5714-5722.
7. S. Zhou, F. Dai, C. Dang, M. Wang, D. Liu, F. Lu and H. Qi, *Green Chem.*, 2019, **21**, 4732-4747.
8. C. Pu, J. Zhang, G. Chang, Y. Xiao, X. Ma, J. Wu, T. Luo, K. Huang, S. Ke, J. Li and X. Yang, *Carbon*, 2020, **159**, 451-460.
